# Supplementary material for: Hybrid material based on a coordination-complex-modified polyoxometalate nanorod (CC/POMNR) and PPy: a new visible light activated and highly efficient photocatalyst
Source: Royal Society of Chemistry journal article supplement (doi:10.1039/c4ta05071a), 2014-11-18
Supplement: c4ta05071a1.pdf [file c4ta05071a1.pdf]

1                                    **Electronic supplementary information (ESI)**

2   **Hybrid material based on coordination complex modified**  
3   **polyoxometalate nanorod (CC/POMNR) and PPy: A new visible light**  
4   **active and high efficient photocatalyst**

5   **Xinxin Xu<sup>a</sup>, Xin Gao<sup>a</sup>, Tingting Lu<sup>a</sup>, Xiaoxia Liu<sup>\*a</sup> and Xiuli Wang<sup>\*b</sup>**

6   *<sup>a</sup>Department of Chemistry, College of Science, Northeast University, Shenyang,*  
7   *Liaoning, 110819, People's Republic of China*

8   *<sup>b</sup>Department of Chemistry, Bohai University, Jinzhou, Liaoning, 121013, People's*  
9   *Republic of China*

10

11

12

13

14

15

16

17

18

19

20

21

22

23

24

25

1 **Table S1.** Crystal data and structure refinement results for **ZnP<sub>2</sub>Mo<sub>5</sub>**

|                                                     |                                                                                                  |
|-----------------------------------------------------|--------------------------------------------------------------------------------------------------|
| Empirical formula                                   | C <sub>48</sub> H <sub>52</sub> N <sub>12</sub> O <sub>29</sub> ZnP <sub>2</sub> Mo <sub>5</sub> |
| Formula weight                                      | 1868.03                                                                                          |
| Crystal system                                      | Monoclinic                                                                                       |
| Space group                                         | <i>P</i> 2 <sub>1</sub> /c                                                                       |
| <i>a</i> /Å                                         | 10.1704(6)                                                                                       |
| <i>b</i> /Å                                         | 21.3474(12)                                                                                      |
| <i>c</i> /Å                                         | 29.3979(16)                                                                                      |
| $\alpha$ /°                                         | 90                                                                                               |
| $\beta$ /°                                          | 90.5890(10)                                                                                      |
| $\gamma$ /°                                         | 90                                                                                               |
| <i>V</i> /Å <sup>3</sup>                            | 6382.3(6)                                                                                        |
| <i>Z</i>                                            | 4                                                                                                |
| <i>D</i> <sub>calcd</sub> /(g cm <sup>-3</sup> )    | 1.944                                                                                            |
| Reflections collected                               | 35473                                                                                            |
| Reflections unique                                  | 11070                                                                                            |
| R(int)                                              | 0.0415                                                                                           |
| Goodness - of - fit on F <sup>2</sup>               | 1.108                                                                                            |
| <i>R</i> <sub>1</sub> [ <i>I</i> > 2σ( <i>I</i> )]  | 0.0523                                                                                           |
| <i>wR</i> <sub>2</sub> [ <i>I</i> > 2σ( <i>I</i> )] | 0.1465                                                                                           |
| <i>R</i> <sub>1</sub> (all data)                    | 0.0637                                                                                           |
| <i>wR</i> <sub>2</sub> (all data)                   | 0.1564                                                                                           |

2 Note.  $R_1 = \Sigma||F_o| - |F_c|| / \Sigma|F_o|$ ;  $wR_2 = \Sigma[w(F_o^2 - F_c^2)^2] / \Sigma[w(F_o^2)^2]^{1/2}$

3

4

5

6

7

8

9

10

11

12

13

14

15

1 **Table S2.** Selected bond lengths of **ZnP<sub>2</sub>Mo<sub>5</sub>**

|              |          |             |          |
|--------------|----------|-------------|----------|
| Mo(1)-O(2)   | 2.307(5) | Mo(1)-O(9)  | 1.863(5) |
| Mo(1)-O(10)  | 1.721(5) | Mo(1)-O(13) | 1.715(5) |
| Mo(1)-O(11)  | 1.970(5) | Mo(1)-O(16) | 2.256(5) |
| Mo(2)-O(2)   | 2.210(5) | Mo(2)-O(4)  | 1.698(5) |
| Mo(2)-O(7)   | 2.309(4) | Mo(2)-O(8)  | 1.718(5) |
| Mo(2)-O(11)  | 1.940(5) | Mo(2)-O(23) | 1.961(5) |
| Mo(3)-O(6)   | 1.723(5) | Mo(3)-O(7)  | 2.293(5) |
| Mo(3)-O(15)  | 1.723(5) | Mo(3)-O(17) | 2.293(5) |
| Mo(3)-O(18)  | 1.908(5) | Mo(3)-O(23) | 1.929(5) |
| Mo(4)-O(3)   | 1.721(5) | Mo(4)-O(17) | 2.385(5) |
| Mo(4)-O(18)  | 1.943(5) | Mo(4)-O(19) | 1.961(5) |
| Mo(4)-O(20)  | 1.704(5) | Mo(4)-O(21) | 2.182(5) |
| Mo(5)-O(5)   | 1.731(6) | Mo(5)-O(9)  | 1.939(5) |
| Mo(5)-O(12)  | 1.702(5) | Mo(5)-O(14) | 2.230(5) |
| Mo(5)-O(19)  | 1.919(5) | Mo(5)-O(21) | 2.425(5) |
| Zn(1)-O(1)#1 | 1.980(5) | Zn(1)-O(22) | 1.982(5) |
| Zn(1)-O(24)  | 2.139(6) | Zn(1)-N(1)  | 2.161(6) |
| Zn(1)-N(4)   | 2.205(6) | P(1)-O(1)   | 1.521(5) |
| P(1)-O(7)    | 1.555(5) | P(1)-O(16)  | 1.531(5) |
| P(1)-O(21)   | 1.564(5) | P(2)-O(2)   | 1.568(5) |
| P(2)-O(14)   | 1.528(5) | P(2)-O(17)  | 1.549(5) |
| P(2)-O(22)   | 1.522(5) |             |          |

2

3

4

5

6

7

8

9

10

11

12

13

1 **Table S3.** Selected bond angles of **ZnP<sub>2</sub>Mo<sub>5</sub>**

|                   |            |                   |           |
|-------------------|------------|-------------------|-----------|
| O(9)-Mo(1)-O(2)   | 87.66(19)  | O(9)-Mo(1)-O(11)  | 148.0(2)  |
| O(9)-Mo(1)-O(16)  | 79.85(19)  | O(10)-Mo(1)-O(2)  | 165.5(2)  |
| O(10)-Mo(1)-O(9)  | 102.6(2)   | O(10)-Mo(1)-O(11) | 96.8(2)   |
| O(10)-Mo(1)-O(16) | 85.2(2)    | O(11)-Mo(1)-O(2)  | 69.60(18) |
| O(11)-Mo(1)-O(16) | 76.62(18)  | O(13)-Mo(1)-O(2)  | 87.1(2)   |
| O(13)-Mo(1)-O(9)  | 100.3(2)   | O(13)-Mo(1)-O(10) | 100.9(2)  |
| O(13)-Mo(1)-O(11) | 100.7(2)   | O(13)-Mo(1)-O(16) | 173.6(2)  |
| O(16)-Mo(1)-O(2)  | 86.55(16)  | O(2)-Mo(2)-O(7)   | 72.97(17) |
| O(4)-Mo(2)-O(2)   | 156.9(2)   | O(4)-Mo(2)-O(7)   | 86.8(2)   |
| O(4)-Mo(2)-O(8)   | 103.6(3)   | O(4)-Mo(2)-O(11)  | 97.4(2)   |
| O(4)-Mo(2)-O(23)  | 100.7(2)   | O(8)-Mo(2)-O(2)   | 98.7(2)   |
| O(8)-Mo(2)-O(7)   | 164.1(2)   | O(8)-Mo(2)-O(11)  | 100.0(2)  |
| O(8)-Mo(2)-O(23)  | 93.4(2)    | O(11)-Mo(2)-O(2)  | 72.26(18) |
| O(11)-Mo(2)-O(7)  | 90.46(18)  | O(11)-Mo(2)-O(23) | 154.3(2)  |
| O(23)-Mo(2)-O(2)  | 84.14(19)  | O(23)-Mo(2)-O(7)  | 72.57(18) |
| O(6)-Mo(3)-O(7)   | 167.9(2)   | O(6)-Mo(3)-O(17)  | 90.5(2)   |
| O(6)-Mo(3)-O(18)  | 101.1(2)   | O(6)-Mo(3)-O(23)  | 99.1(2)   |
| O(15)-Mo(3)-O(6)  | 102.4(2)   | O(15)-Mo(3)-O(7)  | 88.6(2)   |
| O(15)-Mo(3)-O(17) | 166.5(2)   | O(15)-Mo(3)-O(18) | 98.6(2)   |
| O(15)-Mo(3)-O(23) | 100.5(2)   | O(17)-Mo(3)-O(7)  | 79.05(16) |
| O(18)-Mo(3)-O(7)  | 82.09(18)  | O(18)-Mo(3)-O(17) | 74.51(18) |
| O(18)-Mo(3)-O(23) | 148.38(19) | O(23)-Mo(3)-O(7)  | 73.47(18) |
| O(23)-Mo(3)-O(17) | 81.29(19)  | O(3)-Mo(4)-O(17)  | 87.8(2)   |
| O(3)-Mo(4)-O(18)  | 102.7(2)   | O(3)-Mo(4)-O(19)  | 93.9(2)   |
| O(3)-Mo(4)-O(21)  | 158.1(2)   | O(18)-Mo(4)-O(17) | 71.73(17) |
| O(18)-Mo(4)-O(19) | 154.7(2)   | O(18)-Mo(4)-O(21) | 83.03(18) |
| O(19)-Mo(4)-O(17) | 90.26(19)  | O(19)-Mo(4)-O(21) | 74.78(19) |
| O(20)-Mo(4)-O(3)  | 104.0(3)   | O(20)-Mo(4)-O(17) | 164.0(2)  |
| O(20)-Mo(4)-O(18) | 94.8(2)    | O(20)-Mo(4)-O(19) | 99.6(2)   |
| O(20)-Mo(4)-O(21) | 96.5(2)    | O(21)-Mo(4)-O(17) | 73.82(17) |
| O(5)-Mo(5)-O(9)   | 97.7(2)    | O(5)-Mo(5)-O(14)  | 170.5(2)  |
| O(5)-Mo(5)-O(19)  | 98.8(3)    | O(5)-Mo(5)-O(21)  | 83.9(2)   |
| O(9)-Mo(5)-O(14)  | 79.62(19)  | O(9)-Mo(5)-O(21)  | 83.85(18) |
| O(12)-Mo(5)-O(5)  | 102.6(3)   | O(12)-Mo(5)-O(9)  | 103.8(2)  |
| O(12)-Mo(5)-O(14) | 86.9(2)    | O(12)-Mo(5)-O(19) | 100.1(2)  |
| O(12)-Mo(5)-O(21) | 169.0(2)   | O(14)-Mo(5)-O(21) | 86.70(17) |
| O(19)-Mo(5)-O(14) | 79.4(2)    | O(19)-Mo(5)-O(9)  | 147.1(2)  |
| O(19)-Mo(5)-O(21) | 69.87(18)  | O(1)-P(1)-O(7)    | 109.0(3)  |
| O(1)-P(1)-O(16)   | 112.2(3)   | O(1)-P(1)-O(21)   | 111.3(3)  |
| O(7)-P(1)-O(21)   | 109.3(3)   | O(16)-P(1)-O(7)   | 108.6(3)  |
| O(16)-P(1)-O(21)  | 106.4(3)   | O(14)-P(2)-O(2)   | 106.4(3)  |
| O(14)-P(2)-O(17)  | 109.3(3)   | O(17)-P(2)-O(2)   | 108.6(3)  |

|                    |          |                    |          |
|--------------------|----------|--------------------|----------|
| O(22)-P(2)-O(2)    | 109.1(3) | O(22)-P(2)-O(14)   | 112.6(3) |
| O(22)-P(2)-O(17)   | 110.6(3) | O(1)#1-Zn(1)-O(22) | 131.4(2) |
| O(1)#1-Zn(1)-O(24) | 93.7(2)  | O(22)-Zn(1)-O(24)  | 86.8(2)  |
| O(1)#1-Zn(1)-N(1)  | 114.4(2) | O(1)#1-Zn(1)-N(4)  | 97.6(2)  |
| O(22)-Zn(1)-N(1)   | 114.2(2) | O(22)-Zn(1)-N(4)   | 87.3(2)  |
| O(24)-Zn(1)-N(1)   | 89.2(2)  | O(24)-Zn(1)-N(4)   | 168.6(2) |
| N(1)-Zn(1)-N(4)    | 84.4(2)  |                    |          |

1 Symmetry transformations used to generate equivalent atoms for **ZnP<sub>2</sub>Mo<sub>5</sub>**: #1 x-1, y,

2 z.

3

4

5

6

7

8

9

10

11

12

13

14

15

16

17

18

19

20

21

1

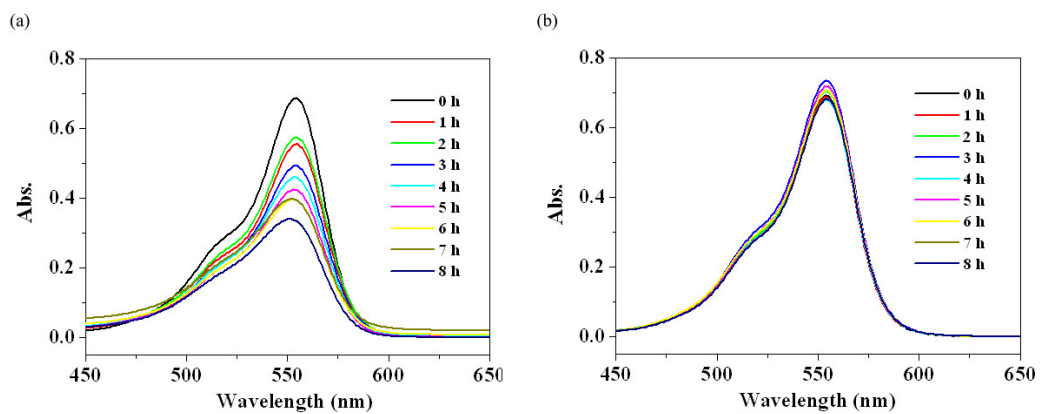

2

3 **Figure S1.** Absorption spectra of RhB degraded by  $\text{ZnP}_2\text{Mo}_5\text{NR}$  under ultraviolet  
4 and visible light irradiation

5

6

7

8

9

10

11

12

13

14

15

16

17

18

19

20

1

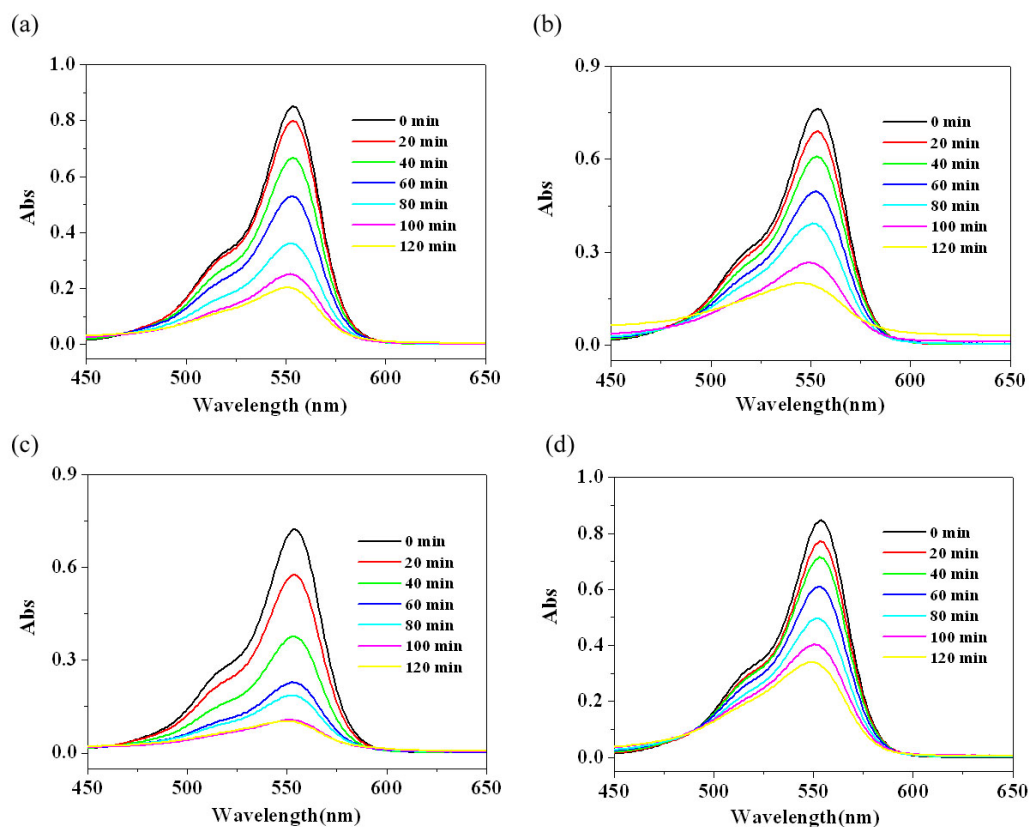

2

3 **Figure S2.** Absorption spectra of RhB degraded by: (a) PPy(A)/ZnP<sub>2</sub>Mo<sub>5</sub>NR; (b)

4 PPy(B)/ZnP<sub>2</sub>Mo<sub>5</sub>NR; (c) PPy(C)/ZnP<sub>2</sub>Mo<sub>5</sub>NR; (d) PPy(D)/ZnP<sub>2</sub>Mo<sub>5</sub>NR by visible

5 light irradiation.

6

7

8

9

10

11

12

13

14

1

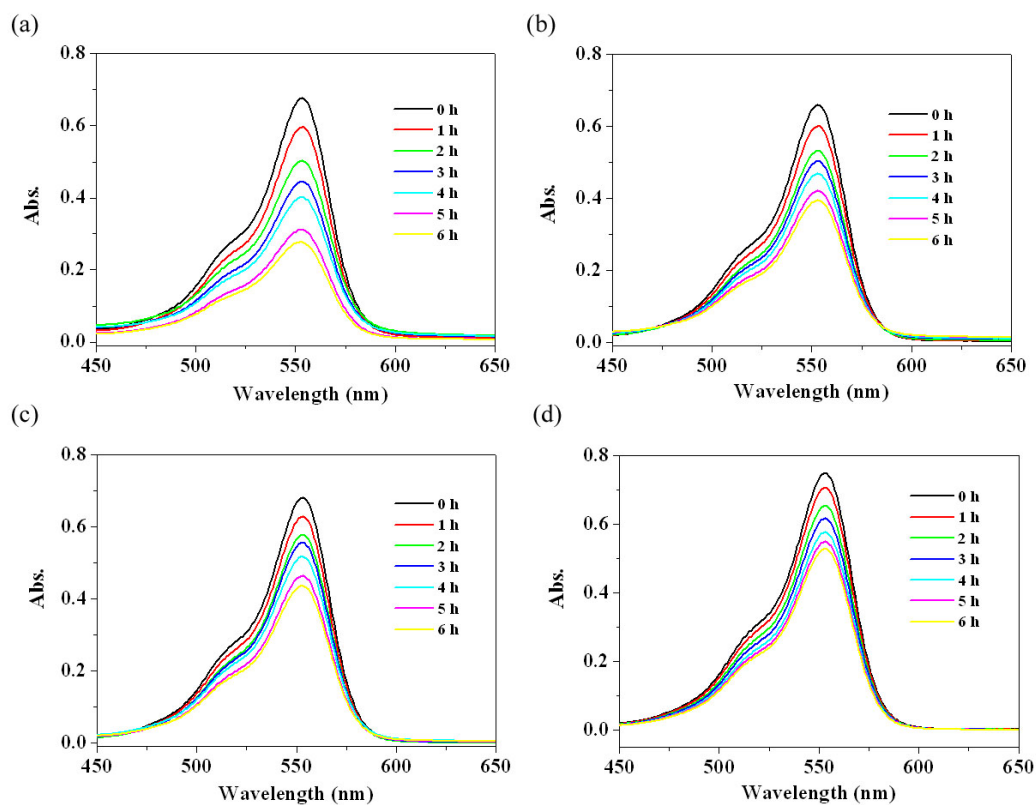

2

3 **Figure S3.** Absorption spectra of RhB degraded by: (a) PPy(A); (b) PPy(B); (c)  
4 PPy(C); (d) PPy(D) under visible light irradiation.

5

6

7

8

9

10

11

12

13

14

15



1

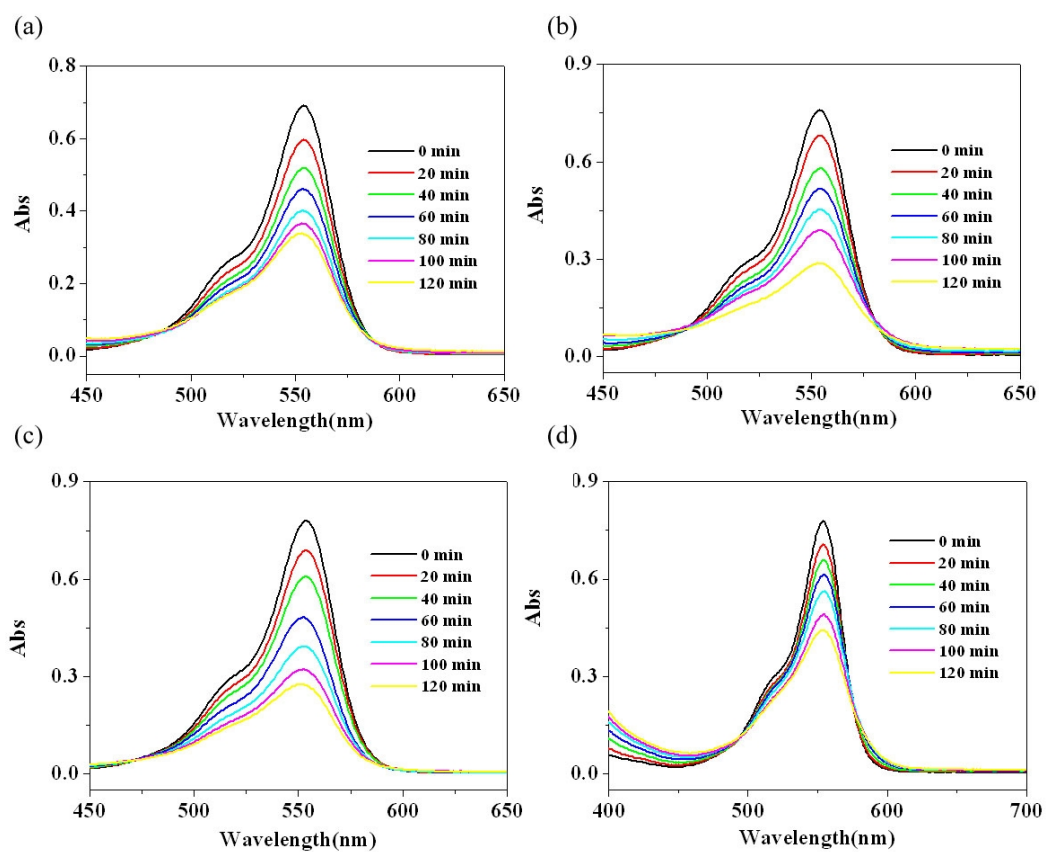

2

3 **Figure S4.** Absorption spectra of RhB degraded by: (a) **PPy(A)/ZnP<sub>2</sub>Mo<sub>5</sub>NR(M)**; (b)  
4 **PPy(B)/ZnP<sub>2</sub>Mo<sub>5</sub>NR(M)**; (c) **PPy(C)/ZnP<sub>2</sub>Mo<sub>5</sub>NR(M)**; (d) **PPy(D)/ZnP<sub>2</sub>Mo<sub>5</sub>NR(M)**  
5 by visible light irradiation.
